# Supplementary material for: Advancing Human Population Genomics with DNA Foundation Models
Source: Research Square preprint supplement (doi:10.21203/rs.3.rs-7889315/v1), 2025-11-10
Supplement: Supplementary file 1 [file bb115f81c33e0bad37c0e473.docx]

Supplementary Information for

**Advancing Human Population Genomics with DNA Foundation Models**

Corresponding author:

Xiaopu Zhou <xiaopu.zhou@sickkids.ca>

Lucila Ohno-Machado <lucila.ohno-machado@yale.edu>

**The PDF file includes:**

Supplementary Text

Figs. S1 to S5

Tables S1 to S14

References

Table of Contents

[A. Supplementary Text 4](#_Toc210807375)

[*Abbreviations* 4](#_Toc210807376)

[B. Supplementary Figure 6](#_Toc210807377)

[*Figure S1. Workflow of the Evo2 scoring process* 6](#_Toc210807378)

[*Figure S2. Schematic of Evo2 zero-shot scoring* 7](#_Toc210807379)

[*Figure S3. Distribution of Evo2 scores for the APOE-ε3 and ε2–tagging haplotype stratified by ancestry in Pangenome dataset* 8](#_Toc210807380)

[*Figure S4. Association of Evo2 haplotype score with brain MRI data in the UK Biobank data.* 9](#_Toc210807381)

[*Figure S5. Phenome-wide association study results for the Evo2 haplotype score in the UK Biobank data (alternative haplotypes).* 10](#_Toc210807382)

[C. Supplementary Table 11](#_Toc210807383)

[*Table S1. Cohort and datasets.* 11](#_Toc210807384)

[*Table S2. Selected 211 AD-associated variants for Evo2 evaluation from AD GWAS data.* 12](#_Toc210807385)

[*Table S3. Mean and SE of Evo2 scores and APOE expression levels across the five major ancestry groups from array expression data.* 17](#_Toc210807386)

[*Table S4. Association of Evo2 haplotype scores with APOE expression in Pangenome data.* 18](#_Toc210807387)

[*Table S5. Correlation of Evo2 haplotype scores with local ancestry burden estimated using RFMix2 in Pangenome data.* 19](#_Toc210807388)

[*Table S6. Mean and SE of Evo2 haplotype scores for APOE-ε4 across the five major ancestry groups in Pangenome data.* 20](#_Toc210807389)

[*Table S7. Association between Evo2 haplotype score and Alzheimer’s disease in the ADNI data.* 21](#_Toc210807390)

[*Table S8. Association of Evo2 haplotype scores with Alzheimer’s disease–related endophenotypes in the ADNI data.* 22](#_Toc210807391)

[*Table S9. Association of Evo2 haplotype score with PET-measured brain amyloid burden in the ADNI data.* 24](#_Toc210807392)

[*Table S10. Association of Evo2 haplotype score with Alzheimer’s disease in the UK Biobank data.* 25](#_Toc210807393)

[*Table S11. Association of Evo2 haplotype score with regional grey matter volumes (FAST) in the UK Biobank data (p-value < 0.05).* 26](#_Toc210807394)

[*Table S12. Association of Evo2 haplotype score with susceptibility weighted brain MRI in the UK Biobank data (p-value < 0.05).* 28](#_Toc210807395)

[*Table S13. Association of Evo2 haplotype score with Olink plasma proteome in the UK Biobank data (FDR < 0.05).* 29](#_Toc210807396)

[*Table S14. Phenome-wide association study results for the Evo2 haplotype score in the UK Biobank data (FDR < 0.05).* 31](#_Toc210807397)

[References 32](#_Toc210807398)

1. Supplementary Text

### *Abbreviations*

1. **Clinical status & cognitive assessments**

**AD**: Alzheimer’s Disease

**MCI**: Mild Cognitive Impairment

**CN**: Cognitively Normal

**ADAS11**/**ADAS13**: Alzheimer’s Disease Assessment Scale (11‑ & 13‑item versions)

**CDRSB**: Clinical Dementia Rating Scale, Sum of Boxes

1. **Research consortia, cohorts & reference resources**

**ADNI**: Alzheimer’s Disease Neuroimaging Initiative

**UKB**: UK Biobank

**IGSR**: International Genome Sample Resource

**HRC**: Haplotype Reference Consortium

1. **Population (super‑population) codes**

**AFR**: African

**AMR**: American

**EAS**: East Asian

**EUR**: European

**SAS**: South Asian

1. **Imaging modalities & derived metrics**

**MRI**: Magnetic Resonance Imaging

**PET**: Positron Emission Tomography

**SWI**: Susceptibility‑Weighted Imaging

**SUVR**: Standardized Uptake Value Ratio

1. **Brain Regions / Segmentations (following cerebroViz)**

**A1C**: primary auditory cortex

**AMY**: amygdala

**ANG**: angular gyrus

**BS**: brainstem

**CAU**: caudate

**CB**: cerebellum

**CNG**: anterior cingulate cortex

**DFC**: dorsolateral prefrontal cortex

**FL**: frontal lobe

**HIP**: hippocampus

**HTH**: hypothalamus

**IPC**: inferior parietal cortex

**ITC**: inferior temporal cortex

**M1C**: primary motor cortex

**MED**: medulla oblongata

**MFC**: medial prefrontal cortex

**OL**: occipital lobe

**OFC**: orbital frontal cortex

**PL**: parietal lobe

**PIT**: pituitary gland

**PUT**: putamen

**PON**: pons

**S1C**: primary somatosensory cortex

**SN**: substantia nigra

**STC**: posterior (caudal) superior temporal cortex

**STR**: striatum

**TL**: temporal lobe

**THA**: thalamus

**V1C**: primary visual cortex

**VFC**: ventrolateral prefrontal cortex

1. **Molecular biology & genomic data types**

**DNA**: Deoxyribonucleic Acid

**WGS**: Whole‑Genome Sequencing

**VCF**: Variant Call Format

**SNP** / **SNV**: Single‑Nucleotide Polymorphism / Variant

**LCL**: Lymphoblastoid Cell Line

**MHC**: Major Histocompatibility Complex

**bp** / **kbp**: Base Pair / Kilo‑Base Pair

1. **Genomic & phenomic study designs / bioinformatic methods**

**GWAS**: Genome‑Wide Association Study

**PheWAS**: Phenome‑Wide Association Study

**PCA**: Principal Component Analysis

**RFmix**: Random‑Forest Mixture (local‑ancestry inference)

1. **Functional genomics & regulatory annotations**

**CA**: Chromatin Accessibility

**PLS**: Promoter‑Like

**pELS**: Proximal Enhancer‑Lik

**dELS**: Distal Enhancer‑Like Signatures

**GO**: Gene Ontology

1. **Computing, AI & hardware acceleration**

**AI**: Artificial Intelligence

**LLM**: Large Language Model

**GPU**: Graphics Processing Unit

**CUDA**: Compute Unified Device Architecture

1. **Statistical & frequency measures**

**FDR**: False Discovery Rate

**MAF**: Minor Allele Frequency

1. **Genes / proteins**

**APOE**: Apolipoprotein E

1. Supplementary Figure

### *Figure S1. Workflow of the Evo2 scoring process*


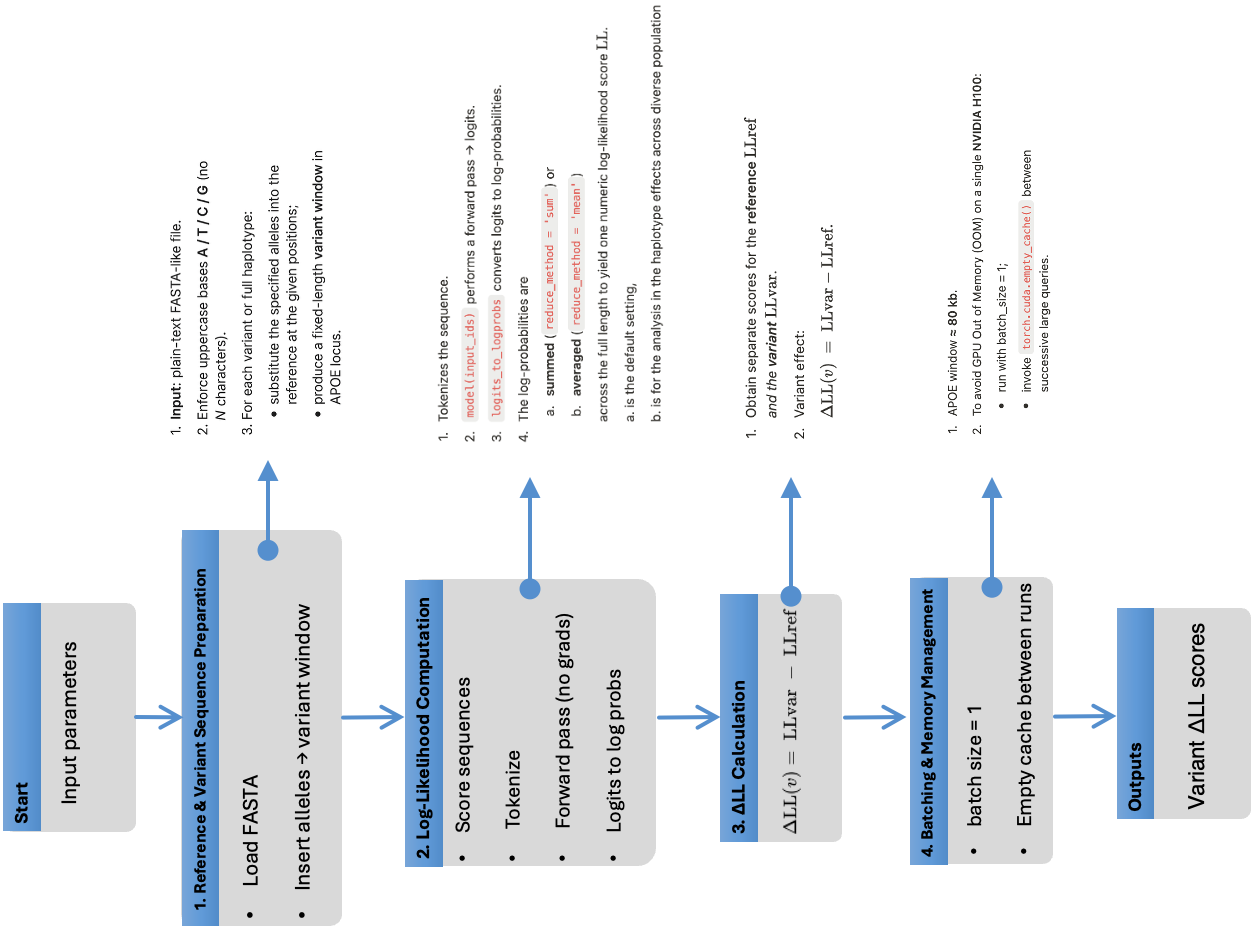


### *Figure S2. Schematic of Evo2 zero-shot scoring*


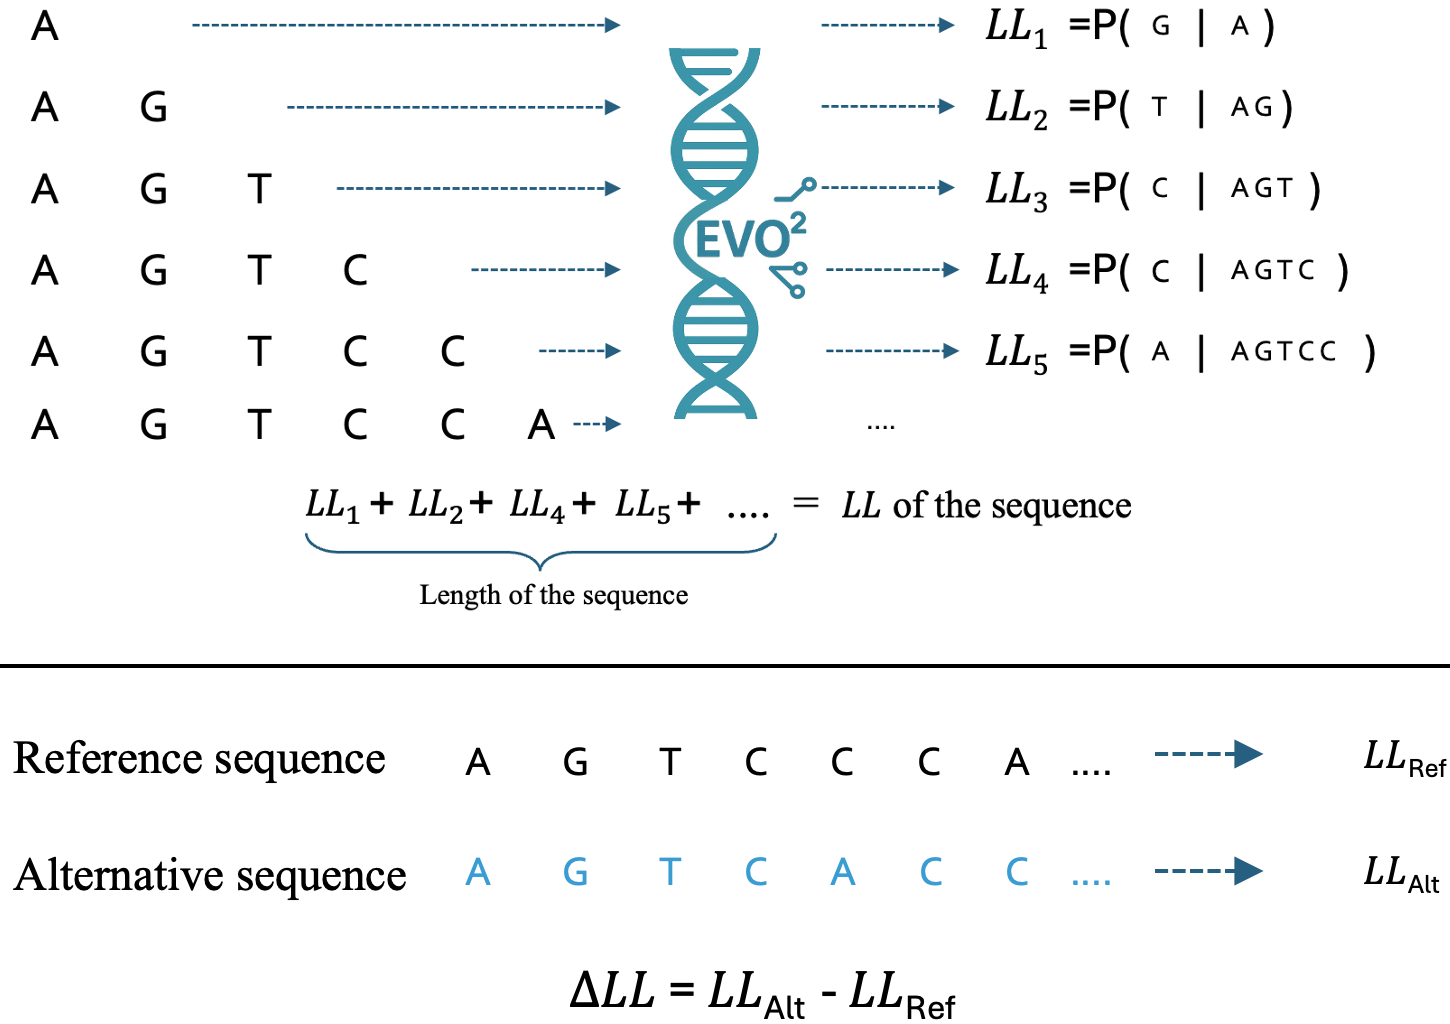


We use Evo2 to estimates the impact of mutations without task-specific training (“zero-shot”). At each position , the model outputs the conditional probability; taking the natural log yields the site-specific log-likelihood . Summing these values across all positions produces the sequence log-likelihood. We independently compute for the reference sequence and for a mutated sequence, then define the Evo2 score as .

### *Figure S3. Distribution of Evo2 scores for the APOE-ε3 and ε2–tagging haplotype stratified by ancestry in Pangenome dataset*


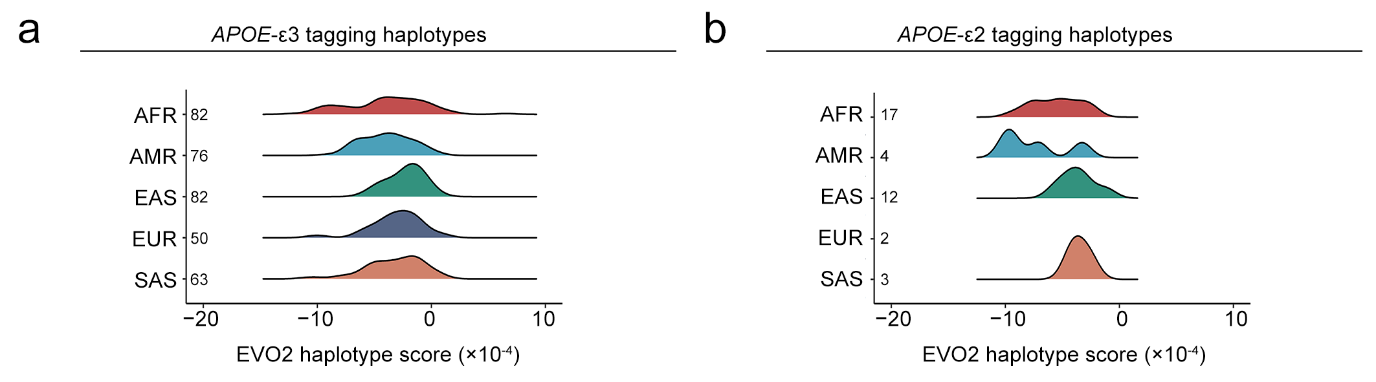


Distribution of Evo2 scores for **(a)** the APOE-ε3–tagging haplotype and **(b)** the APOE-ε2–tagging haplotype, stratified by ancestry. Sample sizes for each ancestry group are indicated on the plots. AFR, African; AMR, American; EAS, East Asian; EUR, European; SAS, South Asian.

### *Figure S4. Association of Evo2 haplotype score with brain MRI data in the UK Biobank data.*


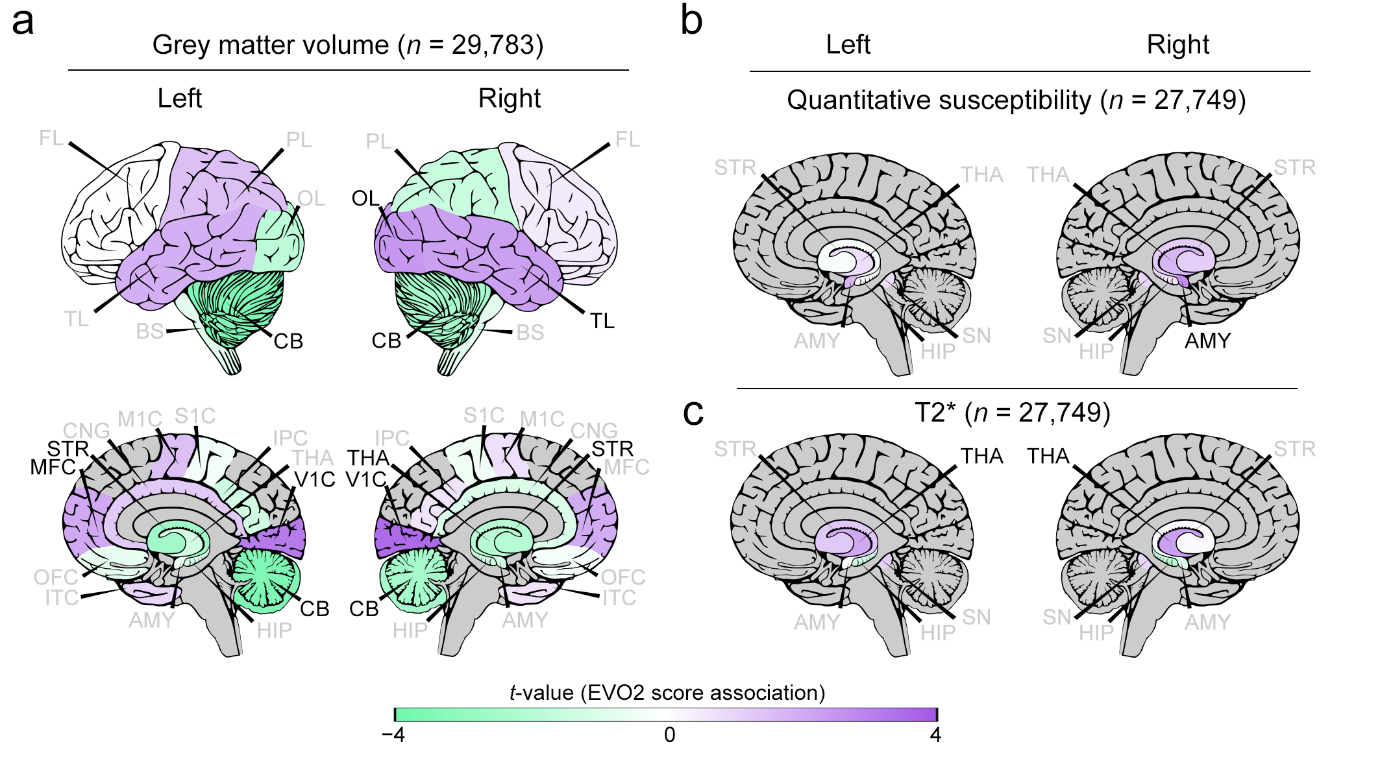


Association between Evo2 haplotype score and brain MRI measures from the UK Biobank. Brain colour map showed results from **(a)** regional grey-matter volume on T1-weighted scans (*n* = 29,783) and susceptibility-weighted imaging metrics (*n* = 27,749), including **(b)** magnetic susceptibility and **(c)** T2* relaxation time. Panels **a** and **c** show results for the leading haplotype; panel **b** shows results for alternative haplotypes. Robust linear regression was applied. Brain regions with P < 0.05 are labelled in black; non-significant regions are in grey. Purple-to-green diverging colour scale represents positive (purple) and negative (green) associations. Region abbreviations follow the scheme in <https://ethanbahl.github.io/cerebroViz/>. Please refer to the **Abbreviations** section in the **Supplementary Text** for the full names of the corresponding brain regions. MRI, magnetic resonance imaging; n, sample size.

### *Figure S5. Phenome-wide association study results for the Evo2 haplotype score in the UK Biobank data (alternative haplotypes).*


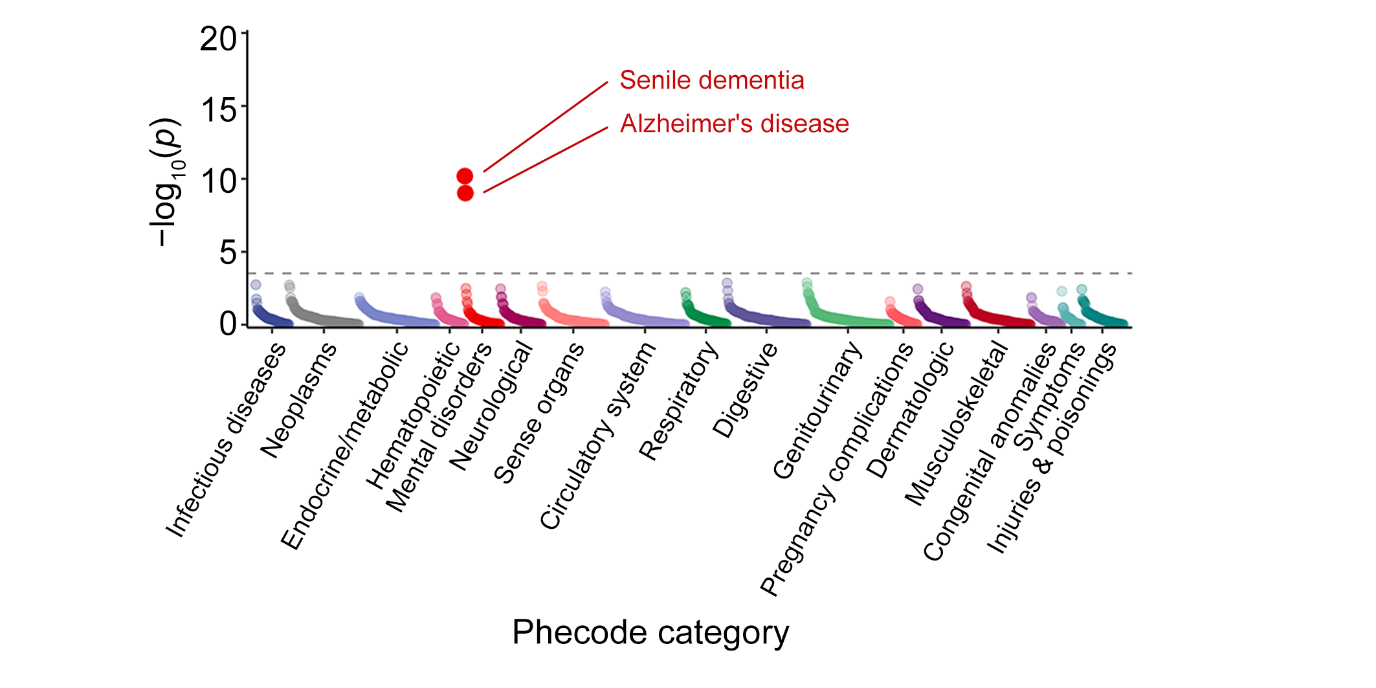


Phenome-wide association study of the Evo2 score for alternative haplotype across 1,547 PheCodes in 331,925 participants, Logistic regression was applied.

1. Supplementary Table

### *Table S1. Cohort and datasets.*

| **AD GWAS dataset** | | | | | |
| --- | --- | --- | --- | --- | --- |
| **Name** | **N (case)** | **N (control)** |  | **Ref (PMID)** | |
| AD_sumstats_Jansen etal_2019sept | 71,880 | 383,378 |  | 306172561, | |
|  | | | | | |
| **Pangenome dataset** | | | | | |
| **Name** | **N (haplotype assembly)** | | | | **Ref (PMID)** |
| HPRC | 230 | | | | 371652422, |
|  | | | | | |
| **1000genome expression array dataset** | | | | | |
| **Name** | **N** | | | | **Ref (PMID)** |
| LCL_array_expression | 587 | | | | 20220756; 203690223,4, |
|  | | | | | |
| **Alzheimer's Disease Neuroimaging Initiative** | | | | | |
| **Items** | **CN** | **MCI** | **AD** | **Ref (PMID)** | |
| **N** | 672 | 604 | 722 | 204518755;  295722826 | |
| **Age (SD)** | 77.0 (7.3) | 77.7 (8.1) | 77.8 (7.8) |
| **Female (%)** | 374 (55.7%) | 247 (40.9%) | 305 (42.2%) |
| **Education Year (SD)** | 16.7 (2.5) | 15.9 (2.9) | 15.6 (2.9) |
| ***APOE*-ε4 carrier (%)** | 195 (29.0%) | 241 (39.9%) | 462 (64.0%) |
| ***APOE*-ε2 carrier (%)** | 88 (13.1%) | 56 (9.3%) | 43 (6.0%) |
|  | | | | | |
| **UK Biobank data** | | | | | |
| **Items** | **N** | | | | **Ref** |
| Unrelated participants passed QC | 333,791 | | | | Category 100313 |
| Regional grey matter volumes (FAST) | 29,783 | | | | Category 1101 |
| Susceptibility weighted brain MRI | 27,749 | | | | Category 109 |
| Protein biomarkers | 36,021 | | | | Category 1839 |
| Summary Diagnoses | 331,925 | | | | Category 2002 |

AD, Alzheimer’s disease; CN, cognitively normal; HPRC, Human Pangenome Reference Consortium; LCL, lymphoblastoid cell line; MCI, mild cognitive impairment; MRI, magnetic resonance imaging; N, sample size; PMID, PubMed ID; QC, quality control; Ref, reference; SD, standard deviation.

### *Table S2. Selected 211 AD-associated variants for Evo2 evaluation from AD GWAS data.*

| Index | rsID | Chr | BP (GRCh37) | A1 | A2 | Evo2_score |
| --- | --- | --- | --- | --- | --- | --- |
| 1 | rs2199575 | 19 | 45345623 | A | G | -0.1641 |
| 2 | rs2199576 | 19 | 45345708 | G | A | -0.1331 |
| 3 | rs2376518 | 19 | 45345773 | T | C | 1.4619 |
| 4 | rs111371860 | 19 | 45345787 | T | A | 1.4219 |
| 5 | rs1985096 | 19 | 45346551 | A | T | 7.8419 |
| 6 | rs1001611 | 19 | 45346768 | A | G | 1.8419 |
| 7 | rs11668738 | 19 | 45347561 | T | G | 4.8819 |
| 8 | rs41289510 | 19 | 45347636 | A | G | -0.8831 |
| 9 | rs4452060 | 19 | 45347911 | A | C | 4.0859 |
| 10 | rs10426423 | 19 | 45348253 | T | C | -2.0181 |
| 11 | rs12162222 | 19 | 45348522 | T | G | -0.4181 |
| 12 | rs77241309 | 19 | 45349177 | C | G | -1.0781 |
| 13 | rs2927472 | 19 | 45349369 | T | C | 8.0619 |
| 14 | rs3810143 | 19 | 45349402 | C | T | 3.0019 |
| 15 | rs2306149 | 19 | 45349963 | A | C | 1.9819 |
| 16 | rs1871047 | 19 | 45351746 | G | A | 7.2319 |
| 17 | rs2972569 | 19 | 45351891 | A | G | 2.3619 |
| 18 | rs1871046 | 19 | 45351937 | C | T | 4.6879 |
| 19 | rs7255063 | 19 | 45352419 | C | G | 3.5719 |
| 20 | rs12974942 | 19 | 45352487 | T | A | 5.7969 |
| 21 | rs4802240 | 19 | 45352804 | T | C | 4.4119 |
| 22 | rs1531516 | 19 | 45353261 | G | C | 2.5319 |
| 23 | rs57537848 | 19 | 45354044 | T | G | 0.8319 |
| 24 | rs2972566 | 19 | 45354238 | G | C | 0.9119 |
| 25 | rs11666329 | 19 | 45354296 | A | G | 2.2319 |
| 26 | rs2927469 | 19 | 45355552 | A | G | 2.4769 |
| 27 | rs11667610 | 19 | 45355595 | T | C | 8.4059 |
| 28 | rs2972559 | 19 | 45355721 | G | C | 0.7019 |
| 29 | rs4802241 | 19 | 45355743 | C | A | -7.0581 |
| 30 | rs2972558 | 19 | 45356141 | C | T | -0.3981 |
| 31 | rs73050205 | 19 | 45356464 | A | T | -6.5231 |
| 32 | rs10421035 | 19 | 45356674 | G | A | 5.3419 |
| 33 | rs35396326 | 19 | 45357003 | G | C | -2.2081 |
| 34 | rs4803763 | 19 | 45357291 | C | G | 5.5219 |
| 35 | rs4803764 | 19 | 45357377 | C | T | -2.8681 |
| 36 | rs2927468 | 19 | 45357939 | A | G | 5.9059 |
| 37 | rs7249933 | 19 | 45358235 | T | C | -1.1281 |
| 38 | rs10410835 | 19 | 45358353 | T | C | 7.1219 |
| 39 | rs12981508 | 19 | 45358500 | A | G | 1.7519 |
| 40 | rs56317818 | 19 | 45359586 | T | C | 3.0719 |
| 41 | rs12462573 | 19 | 45359706 | A | G | 6.2519 |
| 42 | rs2972557 | 19 | 45360573 | G | A | 8.8359 |
| 43 | rs8112526 | 19 | 45360762 | A | G | 5.2619 |
| 44 | rs440277 | 19 | 45361224 | A | G | -2.8481 |
| 45 | rs411920 | 19 | 45361632 | C | T | -5.0481 |
| 46 | rs365653 | 19 | 45361646 | G | A | -6.2421 |
| 47 | rs418227 | 19 | 45361825 | C | T | 9.2319 |
| 48 | rs417193 | 19 | 45361960 | C | T | 7.3619 |
| 49 | rs2436474 | 19 | 45362269 | T | G | 7.1879 |
| 50 | rs377702 | 19 | 45362667 | A | G | 4.5469 |
| 51 | rs454050 | 19 | 45362809 | A | C | 5.3919 |
| 52 | rs387369 | 19 | 45363254 | A | G | 4.3359 |
| 53 | rs403155 | 19 | 45363299 | T | C | 0.5219 |
| 54 | rs12610257 | 19 | 45363392 | T | C | 6.9379 |
| 55 | rs12978931 | 19 | 45363700 | G | A | 0.3419 |
| 56 | rs384973 | 19 | 45363791 | G | T | -3.9481 |
| 57 | rs411856 | 19 | 45364623 | T | C | 13.2919 |
| 58 | rs395683 | 19 | 45364782 | G | A | 11.3419 |
| 59 | rs395710 | 19 | 45364815 | G | A | -3.5081 |
| 60 | rs555608 | 19 | 45365072 | G | A | 11.5819 |
| 61 | rs2436475 | 19 | 45365248 | C | T | 0.3519 |
| 62 | rs11669109 | 19 | 45365476 | C | T | 4.3919 |
| 63 | rs12980613 | 19 | 45365604 | G | A | 5.0319 |
| 64 | rs12980631 | 19 | 45365641 | C | A | 3.5119 |
| 65 | rs11665829 | 19 | 45365817 | A | G | 4.9019 |
| 66 | rs548011 | 19 | 45365961 | G | A | 5.2969 |
| 67 | rs415637 | 19 | 45366178 | A | G | -2.6181 |
| 68 | rs426555 | 19 | 45366275 | T | C | 0.6019 |
| 69 | rs416116 | 19 | 45366345 | A | G | 1.9219 |
| 70 | rs403729 | 19 | 45366410 | C | G | 4.6019 |
| 71 | rs521629 | 19 | 45366603 | A | G | 2.8419 |
| 72 | rs520566 | 19 | 45366656 | A | G | -6.9781 |
| 73 | rs519825 | 19 | 45366779 | C | T | -1.7181 |
| 74 | rs376938 | 19 | 45366830 | G | A | -2.8831 |
| 75 | rs394353 | 19 | 45367473 | A | G | 7.4019 |
| 76 | rs73050216 | 19 | 45367502 | C | G | 3.6219 |
| 77 | rs8105340 | 19 | 45367777 | C | T | 1.9719 |
| 78 | rs3112439 | 19 | 45367972 | G | C | 9.8359 |
| 79 | rs520283 | 19 | 45368082 | A | C | -3.8181 |
| 80 | rs419010 | 19 | 45368320 | C | T | 4.2579 |
| 81 | rs394221 | 19 | 45368424 | C | T | 11.6919 |
| 82 | rs41290098 | 19 | 45370278 | T | A | 4.0619 |
| 83 | rs384653 | 19 | 45370335 | A | G | 1.6879 |
| 84 | rs511825 | 19 | 45370554 | T | C | 7.7619 |
| 85 | rs565566 | 19 | 45370570 | A | C | 6.6819 |
| 86 | rs511147 | 19 | 45370571 | G | A | -0.4281 |
| 87 | rs564724 | 19 | 45370649 | A | G | 5.6819 |
| 88 | rs510297 | 19 | 45370673 | C | A | 0.2269 |
| 89 | rs12610605 | 19 | 45370838 | A | G | 5.1559 |
| 90 | rs416041 | 19 | 45370854 | G | A | 0.2969 |
| 91 | rs4803766 | 19 | 45371168 | A | G | -0.0281 |
| 92 | rs390952 | 19 | 45371594 | A | G | -1.9681 |
| 93 | rs58521715 | 19 | 45372129 | T | A | -5.1331 |
| 94 | rs8104483 | 19 | 45372354 | G | T | 1.0719 |
| 95 | rs8104292 | 19 | 45372707 | A | G | 3.6559 |
| 96 | rs404935 | 19 | 45372794 | A | G | -0.8831 |
| 97 | rs559163390 | 19 | 45372849 | C | A | -2.9681 |
| 98 | rs387465 | 19 | 45372867 | G | A | 2.3919 |
| 99 | rs4803767 | 19 | 45372959 | T | C | -0.8781 |
| 100 | rs11879589 | 19 | 45373276 | A | G | 4.3319 |
| 101 | rs3852857 | 19 | 45373539 | C | G | 0.2319 |
| 102 | rs395908 | 19 | 45373565 | A | G | 4.3719 |
| 103 | rs4081918 | 19 | 45373739 | G | A | -1.4531 |
| 104 | rs79074020 | 19 | 45374350 | C | T | 0.4619 |
| 105 | rs519113 | 19 | 45376284 | G | C | 1.4219 |
| 106 | rs393584 | 19 | 45377334 | A | G | 0.5859 |
| 107 | rs2075642 | 19 | 45377467 | A | G | 5.2719 |
| 108 | rs34278513 | 19 | 45378144 | T | C | 3.9119 |
| 109 | rs11665676 | 19 | 45378719 | T | C | -1.6331 |
| 110 | rs387976 | 19 | 45379060 | C | A | 3.4019 |
| 111 | rs3852859 | 19 | 45379309 | C | T | 5.0119 |
| 112 | rs369599 | 19 | 45379336 | T | C | 6.3219 |
| 113 | rs412776 | 19 | 45379516 | A | G | 4.3519 |
| 114 | rs370705 | 19 | 45379638 | T | C | 2.1119 |
| 115 | rs385982 | 19 | 45379682 | C | A | 6.2269 |
| 116 | rs73050293 | 19 | 45379746 | G | A | 0.0419 |
| 117 | rs11667640 | 19 | 45379791 | T | C | 6.7319 |
| 118 | rs419925 | 19 | 45380126 | C | G | 4.3219 |
| 119 | rs421812 | 19 | 45380545 | T | G | 2.4919 |
| 120 | rs3865427 | 19 | 45380961 | A | C | 3.7319 |
| 121 | rs11668861 | 19 | 45380970 | T | G | -1.0941 |
| 122 | rs150639620 | 19 | 45381292 | T | G | 4.1219 |
| 123 | rs3729640 | 19 | 45381917 | T | C | 4.0119 |
| 124 | rs6859 | 19 | 45382034 | A | G | 3.5219 |
| 125 | rs406456 | 19 | 45382717 | G | A | 1.7579 |
| 126 | rs3852860 | 19 | 45382966 | T | C | 3.1719 |
| 127 | rs11669338 | 19 | 45382984 | G | T | -1.5681 |
| 128 | rs11673139 | 19 | 45383037 | T | A | -3.0181 |
| 129 | rs3852861 | 19 | 45383061 | T | G | 5.1619 |
| 130 | rs71352237 | 19 | 45383079 | C | T | 0.0019 |
| 131 | rs34224078 | 19 | 45383115 | G | A | 0.4019 |
| 132 | rs35879138 | 19 | 45383139 | A | T | 1.6119 |
| 133 | rs148303016 | 19 | 45383830 | T | C | -0.8881 |
| 134 | rs11083749 | 19 | 45384105 | T | C | 0.0819 |
| 135 | rs406315 | 19 | 45384116 | G | A | 3.2919 |
| 136 | rs73052307 | 19 | 45384405 | C | T | -1.5941 |
| 137 | rs3745150 | 19 | 45385759 | C | G | -2.5621 |
| 138 | rs149450221 | 19 | 45386040 | A | T | 4.6559 |
| 139 | rs283808 | 19 | 45387034 | C | A | 0.3119 |
| 140 | rs283809 | 19 | 45387057 | G | A | 0.8669 |
| 141 | rs12972156 | 19 | 45387459 | G | C | -1.0381 |
| 142 | rs12972970 | 19 | 45387596 | A | G | 1.5819 |
| 143 | rs34342646 | 19 | 45388130 | A | G | 3.8219 |
| 144 | rs283810 | 19 | 45388241 | G | T | -3.2381 |
| 145 | rs283811 | 19 | 45388500 | G | A | -0.6331 |
| 146 | rs283813 | 19 | 45389174 | A | T | 0.5719 |
| 147 | rs283814 | 19 | 45389224 | A | G | 1.7119 |
| 148 | rs283815 | 19 | 45390333 | G | A | 3.3619 |
| 149 | rs6857 | 19 | 45392254 | T | C | 2.0819 |
| 150 | rs76692773 | 19 | 45394211 | T | C | 0.4119 |
| 151 | rs71352238 | 19 | 45394336 | C | T | 4.9519 |
| 152 | rs184017 | 19 | 45394969 | G | T | 3.9119 |
| 153 | rs157580 | 19 | 45395266 | G | A | 1.3359 |
| 154 | rs2075649 | 19 | 45395330 | G | A | 5.3669 |
| 155 | rs2075650 | 19 | 45395619 | G | A | 6.4519 |
| 156 | rs157581 | 19 | 45395714 | C | T | 8.5079 |
| 157 | rs34095326 | 19 | 45395844 | A | G | 2.8919 |
| 158 | rs34404554 | 19 | 45395909 | G | C | 0.5019 |
| 159 | rs11556505 | 19 | 45396144 | T | C | 5.1019 |
| 160 | rs157582 | 19 | 45396219 | T | C | 6.6559 |
| 161 | rs59007384 | 19 | 45396665 | T | G | 3.0119 |
| 162 | rs157584 | 19 | 45396899 | C | T | 4.0469 |
| 163 | rs157585 | 19 | 45397512 | C | A | 6.6219 |
| 164 | rs157588 | 19 | 45398264 | T | C | -0.3681 |
| 165 | rs11668327 | 19 | 45398633 | C | G | -1.1281 |
| 166 | rs157590 | 19 | 45398716 | C | A | 2.9719 |
| 167 | rs2238681 | 19 | 45398817 | T | C | 2.7519 |
| 168 | rs8106922 | 19 | 45401666 | G | A | 5.6559 |
| 169 | rs55821237 | 19 | 45401782 | C | T | 5.6169 |
| 170 | rs56290633 | 19 | 45401783 | T | C | 2.9379 |
| 171 | rs34878901 | 19 | 45402477 | T | C | 2.8519 |
| 172 | rs35568738 | 19 | 45402718 | C | G | -0.2031 |
| 173 | rs1160985 | 19 | 45403412 | T | C | 3.4769 |
| 174 | rs760136 | 19 | 45403858 | G | A | 4.5859 |
| 175 | rs1160984 | 19 | 45403924 | T | C | 4.0319 |
| 176 | rs741780 | 19 | 45404431 | C | T | 1.8669 |
| 177 | rs405697 | 19 | 45404691 | A | G | -5.1881 |
| 178 | rs1038025 | 19 | 45404972 | C | T | 2.5819 |
| 179 | rs1038026 | 19 | 45405062 | G | A | 2.6219 |
| 180 | rs1305062 | 19 | 45405521 | C | G | -3.7981 |
| 181 | rs10119 | 19 | 45406673 | A | G | 10.1719 |
| 182 | rs7259620 | 19 | 45407788 | A | G | 1.9419 |
| 183 | rs769446 | 19 | 45408628 | C | T | 12.6519 |
| 184 | rs405509 | 19 | 45408836 | G | T | 5.5619 |
| 185 | rs440446 | 19 | 45409167 | C | G | 4.5419 |
| 186 | rs769449 | 19 | 45410002 | A | G | 1.6319 |
| 187 | rs769450 | 19 | 45410444 | A | G | 0.8619 |
| 188 | rs429358 | 19 | 45411941 | C | T | 15.2919 |
| 189 | rs7412 | 19 | 45412079 | T | C | -24.2031 |
| 190 | rs1065853 | 19 | 45413233 | G | T | 3.7019 |
| 191 | rs1081106 | 19 | 45413366 | C | T | -4.4281 |
| 192 | rs75627662 | 19 | 45413576 | T | C | 7.8669 |
| 193 | rs439401 | 19 | 45414451 | T | C | 2.9769 |
| 194 | rs10414043 | 19 | 45415713 | A | G | 0.0219 |
| 195 | rs7256200 | 19 | 45415935 | T | G | -0.9281 |
| 196 | rs483082 | 19 | 45416178 | T | G | 3.2419 |
| 197 | rs59325138 | 19 | 45416291 | T | C | 4.8819 |
| 198 | rs584007 | 19 | 45416478 | A | G | -2.2381 |
| 199 | rs438811 | 19 | 45416741 | T | C | 6.2919 |
| 200 | rs5117 | 19 | 45418790 | C | T | 8.6719 |
| 201 | rs3826688 | 19 | 45418961 | T | C | 1.1219 |
| 202 | rs3925681 | 19 | 45421100 | A | G | 1.9119 |
| 203 | rs12721046 | 19 | 45421254 | A | G | 6.2119 |
| 204 | rs12721056 | 19 | 45421744 | T | G | 4.5469 |
| 205 | rs484195 | 19 | 45421877 | A | G | 4.8319 |
| 206 | rs12721051 | 19 | 45422160 | G | C | -3.6881 |
| 207 | rs56131196 | 19 | 45422846 | A | G | -0.2581 |
| 208 | rs4420638 | 19 | 45422946 | G | A | 1.2519 |
| 209 | rs78959900 | 19 | 45423636 | A | G | 2.9119 |
| 210 | rs814573 | 19 | 45424351 | A | T | 5.0859 |
| 211 | rs157592 | 19 | 45424514 | A | C | 7.5219 |

A1, effect allele; A2, reference allele; BP, base position; Chr, chromosome; rsID, dbSNP identifier.

### *Table S3. Mean and SE of Evo2 scores and APOE expression levels across the five major ancestry groups from array expression data.*

|  | Evo2 score | | APOE expression | |
| --- | --- | --- | --- | --- |
| Ancestry | **mean** | **SE** | **mean** | **SE** |
| AFR | -3.80E-04 | 3.01E-05 | -0.321 | 0.067 |
| AMR | -4.16E-04 | 5.88E-05 | -0.296 | 0.124 |
| EAS | -2.23E-04 | 1.81E-05 | 0.226 | 0.081 |
| EUR | -2.70E-04 | 3.28E-05 | 0.213 | 0.097 |
| SAS | -3.08E-04 | 2.89E-05 | 0.153 | 0.105 |

AFR, African; AMR, American; EAS, East Asian; EUR, European; SAS, South Asian; SE, standard error.

### *Table S4. Association of Evo2 haplotype scores with APOE expression in Pangenome data.*

|  | Beta | SE | df | t value | Pr(>|t|) |
| --- | --- | --- | --- | --- | --- |
| leading haplotype | 393.08 | 885.22 | 31.00 | 0.44 | 0.660 |
| alternative haplotype | 1820.77 | 726.54 | 30.38 | 2.51 | **0.018** |

Linear mix model; n=33. Beta, effect size; df, degree of freedom; SE, standard error.

### *Table S5. Correlation of Evo2 haplotype scores with local ancestry burden estimated using RFMix2 in Pangenome data.*

| CRF anchors coordinates  (GRCh38) | Value | African | American | East Asian | European | South Asian |
| --- | --- | --- | --- | --- | --- | --- |
| 19:44847498 | Spearman r | -0.125 | 0.036 | 0.048 | -0.102 | -0.098 |
| p-value | **0.0078** | 0.4490 | 0.3070 | **0.0289** | **0.0369** |
| 19:44856449 | Spearman r | -0.115 | -0.015 | 0.119 | -0.063 | -0.117 |
| p-value | **0.0144** | 0.7490 | **0.0114** | 0.1820 | **0.0125** |
| 19:44867581 | Spearman r | -0.120 | -0.036 | 0.130 | -0.042 | -0.098 |
| p-value | **0.0102** | 0.4430 | **0.0055** | 0.3730 | **0.0360** |
| 19:44869097 | Spearman r | -0.119 | -0.069 | 0.140 | -0.026 | -0.092 |
| p-value | **0.0114** | 0.1410 | **0.0028** | 0.5860 | **0.0488** |
| 19:44876534 | Spearman r | -0.137 | -0.120 | 0.164 | -0.068 | -0.074 |
| p-value | **0.0035** | **0.0104** | **0.0004** | 0.1490 | 0.1140 |
| 19:44880326 | Spearman r | -0.136 | -0.123 | 0.157 | -0.020 | -0.071 |
| p-value | **0.0035** | **0.0086** | **0.0008** | 0.6740 | 0.1320 |
| 19:44892962 | Spearman r | -0.113 | -0.082 | 0.144 | -0.014 | -0.109 |
| p-value | **0.0158** | 0.0804 | **0.0021** | 0.7700 | **0.0201** |
| 19:44904531 | Spearman r | -0.124 | -0.055 | 0.149 | -0.014 | -0.107 |
| p-value | **0.0082** | 0.2440 | **0.0015** | 0.7740 | **0.0222** |
| 19:44911135 | Spearman r | -0.127 | -0.056 | 0.151 | -0.012 | -0.109 |
| p-value | **0.0066** | 0.2380 | **0.0012** | 0.8000 | **0.0204** |
| 19:44919589 | Spearman r | -0.133 | -0.057 | 0.165 | -0.004 | -0.116 |
| p-value | **0.0045** | 0.2270 | **0.0004** | 0.9370 | **0.0130** |

Bold indicates p-value < 0.05. CRF, conditional-random-field.

### *Table S6. Mean and SE of Evo2 haplotype scores for APOE-ε4 across the five major ancestry groups in Pangenome data.*

|  | Evo2 score  (*APOE*-ε4 tagging haplotype) | | *APOE*-ε4 odds ratios | |
| --- | --- | --- | --- | --- |
| Ancestry | **mean** | **SE** | **mean** | **SE** |
| AFR | -2.52E-04 | 6.05E-05 | 2.18 | 0.15 |
| AMR | -2.29E-04 | 1.12E-04 | 1.90 | 0.14 |
| EAS | 1.33E-04 | 2.99E-05 | 4.54 | 0.30 |
| EUR | 4.90E-05 | 6.53E-05 | 3.46 | 0.10 |
| SAS | -1.24E-04 | 7.00E-05 |  |  |

AFR, African; AMR, American; EAS, East Asian; EUR, European; SE, standard error. The APOE-ε4 odds ratios for AD was obtained from PMID: 37930705 7.

### *Table S7. Association between Evo2 haplotype score and Alzheimer’s disease in the ADNI data.*

| AD vs CN | | | | |
| --- | --- | --- | --- | --- |
|  | **Beta** | **SE** | **z_value** | **Pr(>|z|)** |
| ALL | | | | |
| Leading haplotype | 0.016 | 0.005 | 3.376 | **7.36E-04** |
| Alternative haplotype | 0.004 | 0.004 | 1.169 | 2.42E-01 |
| *APOE*-ε4 (0 copies) | | | | |
| Leading haplotype | 0.014 | 0.007 | 2.044 | **4.09E-02** |
| Alternative haplotype | -0.005 | 0.005 | -1.029 | 3.04E-01 |
| *APOE*-ε4 (1 copy) | | | | |
| Leading haplotype | -0.029 | 0.019 | -1.538 | 1.24E-01 |
| Alternative haplotype | 0.003 | 0.006 | 0.447 | 6.55E-01 |
| *APOE*-ε4 (2 copies) | | | | |
| Leading haplotype | -0.019 | 0.033 | -0.572 | 5.68E-01 |
| Alternative haplotype | -0.022 | 0.021 | -1.03 | 3.03E-01 |
|  |  |  |  |  |
| AD vs MCI | | | | |
|  | **Beta** | **SE** | **z_value** | **Pr(>|z|)** |
| ALL | | | | |
| Leading haplotype | 0.019 | 0.005 | 4.108 | **4.00E-05** |
| Alternative haplotype | 0.006 | 0.003 | 1.799 | 7.20E-02 |
| *APOE*-ε4 (0 copies) | | | | |
| Leading haplotype | 0.024 | 0.007 | 3.544 | **3.94E-04** |
| Alternative haplotype | -0.006 | 0.005 | -1.223 | 2.21E-01 |
| *APOE*-ε4 (1 copy) | | | | |
| Leading haplotype | -0.016 | 0.017 | -0.934 | 3.50E-01 |
| Alternative haplotype | 0.013 | 0.006 | 2.374 | **1.76E-02** |
| *APOE*-ε4 (2 copies) | | | | |
| Leading haplotype | -0.003 | 0.021 | -0.157 | 8.75E-01 |
| Alternative haplotype | 0.012 | 0.014 | 0.861 | 3.89E-01 |

AD, Alzheimer’s disease; Beta, effect size; CN, cognitively normal; MCI, mild cognitive impairment; SE, standard error.

### *Table S8. Association of Evo2 haplotype scores with Alzheimer’s disease–related endophenotypes in the ADNI data.*

| ALL | | | | |
| --- | --- | --- | --- | --- |
|  | **Beta** | **SE** | **z_value** | **Pr(>|z|)** |
| MMSE |  |  |  |  |
| Leading haplotype | -0.012 | 0.004 | -2.811 | **0.0050** |
| Alternative haplotype | -0.004 | 0.003 | -1.406 | 0.1599 |
| CDRSB |  |  |  |  |
| Leading haplotype | 0.005 | 0.002 | 2.472 | **0.0135** |
| Alternative haplotype | 0.002 | 0.002 | 1.277 | 0.2017 |
| ADAS11 |  |  |  |  |
| Leading haplotype | 0.025 | 0.009 | 2.637 | **0.0084** |
| Alternative haplotype | 0.014 | 0.007 | 1.903 | 0.0572 |
| ADAS13 |  |  |  |  |
| Leading haplotype | 0.043 | 0.015 | 2.926 | **0.0035** |
| Alternative haplotype | 0.022 | 0.012 | 1.898 | 0.0579 |
| Whole Brain |  |  |  |  |
| Leading haplotype | -270.900 | 143.900 | -1.883 | 0.0599 |
| Alternative haplotype | 87.980 | 108.800 | 0.809 | 0.4189 |
| Entorhinal |  |  |  |  |
| Leading haplotype | -3.121 | 1.422 | -2.195 | **0.0283** |
| Alternative haplotype | -1.813 | 1.139 | -1.592 | 0.1117 |
| Hippocampus |  |  |  |  |
| Leading haplotype | -4.771 | 2.275 | -2.097 | **0.0361** |
| Alternative haplotype | -3.791 | 1.766 | -2.147 | **0.0319** |
| non-CN | | | | |
|  | **Beta** | **SE** | **z_value** | **Pr(>|z|)** |
| MMSE |  |  |  |  |
| Leading haplotype | -0.009 | 0.006 | -1.714 | 0.0867 |
| Alternative haplotype | -0.005 | 0.004 | -1.286 | 0.1985 |
| CDRSB |  |  |  |  |
| Leading haplotype | 0.006 | 0.003 | 1.936 | 0.0531 |
| Alternative haplotype | 0.002 | 0.002 | 0.790 | 0.4299 |
| ADAS11 |  |  |  |  |
| Leading haplotype | 0.030 | 0.012 | 2.483 | **0.0131** |
| Alternative haplotype | 0.021 | 0.009 | 2.314 | **0.0208** |
| ADAS13 |  |  |  |  |
| Leading haplotype | 0.047 | 0.018 | 2.606 | **0.0093** |
| Alternative haplotype | 0.031 | 0.013 | 2.341 | **0.0194** |
| Whole Brain |  |  |  |  |
| Leading haplotype | -362.200 | 171.300 | -2.114 | **0.0347** |
| Alternative haplotype | 74.290 | 127.200 | 0.584 | 0.5592 |
| Entorhinal |  |  |  |  |
| Leading haplotype | -2.128 | 1.874 | -1.136 | 0.2563 |
| Alternative haplotype | -2.818 | 1.306 | -2.157 | **0.0312** |
| Hippocampus |  |  |  |  |
| Leading haplotype | -3.852 | 2.687 | -1.434 | 0.1519 |
| Alternative haplotype | -4.941 | 2.068 | -2.389 | **0.0170** |

ADAS11, 11-item Alzheimer’s Disease Assessment Scale–Cognitive Subscale; ADAS13, 13-item Alzheimer’s Disease Assessment Scale–Cognitive Subscale; Beta, effect size; CDR-SB, Clinical Dementia Rating–Sum of Boxes; CN, cognitively normal; MMSE, Mini-Mental State Examination; SE, standard error.

### *Table S9. Association of Evo2 haplotype score with PET-measured brain amyloid burden in the ADNI data.*

| ALL | | | | |
| --- | --- | --- | --- | --- |
|  | **Beta** | **SE** | **t value** | **Pr(>|t|)** |
| Leading haplotype | 0.0033 | 0.0010 | 3.3200 | **9.85E-04** |
| Alternative haplotype | 0.0016 | 0.0007 | 2.1620 | **3.12E-02** |
|  |  |  |  |  |
| MCI | | | | |
|  | **Beta** | **SE** | **t value** | **Pr(>|t|)** |
| Leading haplotype | 0.0049 | 0.0016 | 2.9720 | **3.46E-03** |
| Alternative haplotype | 0.0016 | 0.0012 | 1.3320 | 1.85E-01 |

Beta, effect size; MCI, mild cognitive impairment; PET, Positron Emission Tomography scan, SE, standard error.

### *Table S10. Association of Evo2 haplotype score with Alzheimer’s disease in the UK Biobank data.*

| AD vs. controls (2,572 AD; 117,330 controls) | | | | |
| --- | --- | --- | --- | --- |
|  | **Beta** | **SE** | **z_value** | **Pr(>|z|)** |
| Leading haplotype | 2.84E-02 | 1.91E-03 | 14.818 | **< 2e-16** |
| Alternative haplotype | 7.87E-03 | 1.33E-03 | 5.919 | **3.24E-09** |

AD, Alzheimer’s disease; Beta, effect size; SE, standard error.

### *Table S11. Association of Evo2 haplotype score with regional grey matter volumes (FAST) in the UK Biobank data (p-value < 0.05).*

| **Left Brain (leading haplotype)** | | | | | | |
| --- | --- | --- | --- | --- | --- | --- |
| **Region** | **Mapped**  **Region** | **Beta** | **SE** | **t_value** | **p_value** | **FDR** |
| I IV Cerebellum | CB | -0.0016 | 0.0005 | -3.5136 | **4.43E-04** | 0.03 |
| V Cerebellum | CB | -0.0013 | 0.0004 | -2.9339 | **3.35E-03** | 0.12 |
| Crus I Cerebellum | CB | -0.0011 | 0.0004 | -2.7317 | **6.31E-03** | 0.14 |
| Frontal Medial Cortex | MFC | 0.0009 | 0.0004 | 2.0578 | **3.96E-02** | 0.31 |
| Ventral Striatum | STR | -0.0011 | 0.0004 | -2.5481 | **1.08E-02** | 0.19 |
| Supracalcarine Cortex | V1C | 0.0014 | 0.0004 | 3.1682 | **1.54E-03** | 0.07 |
| Intracalcarine Cortex | V1C | 0.0012 | 0.0004 | 2.6886 | **7.18E-03** | 0.14 |
| Cuneal Cortex | V1C | 0.0009 | 0.0004 | 1.9953 | **4.60E-02** | 0.31 |
| **Right Brain (leading haplotype)** | | | | | | |
| **Region** | **Mapped**  **Region** | **Beta** | **SE** | **t_value** | **p_value** | **FDR** |
| I IV Cerebellum | CB | -0.0011 | 0.0004 | -2.4327 | **1.50E-02** | 0.19 |
| Crus I Cerebellum | CB | -0.0009 | 0.0004 | -2.1623 | **3.06E-02** | 0.30 |
| V Cerebellum | CB | -0.0009 | 0.0004 | -2.0067 | **4.48E-02** | 0.31 |
| VI Cerebellum | CB | -0.0008 | 0.0004 | -1.9826 | **4.74E-02** | 0.31 |
| Lateral Occipital Cortex superior division | OL | 0.0009 | 0.0004 | 2.4448 | **1.45E-02** | 0.19 |
| Occipital Pole | OL | 0.0009 | 0.0004 | 2.2010 | **2.77E-02** | 0.30 |
| Ventral Striatum | STR | -0.0008 | 0.0004 | -2.0109 | **4.43E-02** | 0.31 |
| Thalamus | THA | -0.0009 | 0.0004 | -2.0126 | **4.42E-02** | 0.31 |
| Middle Temporal Gyrus temporooccipital part | TL | 0.0009 | 0.0004 | 2.2348 | **2.54E-02** | 0.29 |
| Intracalcarine Cortex | V1C | 0.0015 | 0.0004 | 3.5148 | **4.41E-04** | 0.03 |
| Cuneal Cortex | V1C | 0.0011 | 0.0004 | 2.7456 | **6.04E-03** | 0.14 |
| Supracalcarine Cortex | V1C | 0.0010 | 0.0004 | 2.4441 | **1.45E-02** | 0.19 |
| **Left Brain (alternative haplotype)** | | | | | | |
| **Region** | **Mapped**  **Region** | **Beta** | **SE** | **t_value** | **p_value** | **FDR** |
| I IV Cerebellum | CB | 0.0010 | 0.0004 | 2.8467 | **4.42E-03** | 0.11 |
| Crus II Cerebellum | CB | 0.0009 | 0.0003 | 2.7151 | **6.63E-03** | 0.11 |
| V Cerebellum | CB | 0.0008 | 0.0003 | 2.4752 | **1.33E-02** | 0.15 |
| Crus I Cerebellum | CB | 0.0007 | 0.0003 | 2.0528 | **4.01E-02** | 0.25 |
| Precentral Gyrus | M1C | -0.0008 | 0.0003 | -2.7820 | **5.41E-03** | 0.11 |
| Frontal Medial Cortex | MFC | -0.0007 | 0.0003 | -2.1129 | **3.46E-02** | 0.24 |
| Occipital Pole | OL | -0.0007 | 0.0003 | -2.3520 | **1.87E-02** | 0.17 |
| Central Opercular Cortex | PL | 0.0006 | 0.0003 | 2.1001 | **3.57E-02** | 0.24 |
| Superior Temporal Gyrus posterior division | STC | 0.0009 | 0.0003 | 2.6686 | **7.62E-03** | 0.11 |
| **Right Brain (alternative haplotype)** | | | | | | |
| **Region** | **Mapped**  **Region** | **Beta** | **SE** | **t_value** | **p_value** | **FDR** |
| V Cerebellum | CB | 0.0010 | 0.0003 | 2.8835 | **3.94E-03** | 0.11 |
| VI Cerebellum | CB | 0.0009 | 0.0003 | 2.7772 | **5.49E-03** | 0.11 |
| I IV Cerebellum | CB | 0.0009 | 0.0003 | 2.7325 | **6.29E-03** | 0.11 |
| Crus II Cerebellum | CB | 0.0009 | 0.0003 | 2.6750 | **7.48E-03** | 0.11 |
| X Cerebellum | CB | 0.0009 | 0.0003 | 2.5788 | **9.92E-03** | 0.13 |
| VIIb Cerebellum | CB | 0.0008 | 0.0003 | 2.2372 | **2.53E-02** | 0.20 |
| Inferior Temporal Gyrus posterior division | ITC | 0.0007 | 0.0003 | 2.2596 | **2.39E-02** | 0.20 |
| Frontal Medial Cortex | MFC | -0.0007 | 0.0003 | -2.0879 | **3.68E-02** | 0.24 |
| Frontal Orbital Cortex | OFC | -0.0008 | 0.0003 | -2.9468 | **3.21E-03** | 0.11 |

Beta, effect size; FDR, false discovery rate; SE, standard error. Analyses covered 29,783 participants across 139 brain regions for both leading and alternative haplotypes.

### *Table S12. Association of Evo2 haplotype score with susceptibility weighted brain MRI in the UK Biobank data (p-value < 0.05).*

| Magnetic susceptibility | | | | | | |
| --- | --- | --- | --- | --- | --- | --- |
| Region | **Predictor** | **Beta** | **SE** | **t_value** | **p_value** | **FDR** |
| amygdala (right) | Alternative haplotype | 0.0011 | 0.0004 | 2.6939 | **0.0071** | 0.113 |
|  |  |  |  |  |  |  |
| T2star | | | | | | |
| Region | **Predictor** | **Beta** | **SE** | **t_value** | **p_value** | **FDR** |
| thalamus (right) | Leading haplotype | 0.0011 | 0.0005 | 2.2220 | **0.0263** | 0.331 |
| thalamus (left) | Leading haplotype | 0.0010 | 0.0005 | 2.0397 | **0.0414** | 0.331 |

Beta, effect size; FDR, false discovery rate; SE, standard error. Analyses covered 27,749 participants across 16 brain regions for Magnetic susceptibility and T2star imaging data for both leading and alternative haplotypes.

### *Table S13. Association of Evo2 haplotype score with Olink plasma proteome in the UK Biobank data (FDR < 0.05).*

| **Leading haplotype** | | | | | |
| --- | --- | --- | --- | --- | --- |
| **Protein** | **Beta** | **SE** | **t_value** | **p_value** | **FDR** |
| apoe | -0.01783 | 0.00045 | -39.41298 | <E-200 | **<E-200** |
| snap25 | 0.01098 | 0.00047 | 23.44524 | 1.88E-120 | **2.73E-117** |
| ment | 0.00803 | 0.00045 | 17.74819 | 4.09E-70 | **3.97E-67** |
| pla2g7 | 0.00611 | 0.00043 | 14.28480 | 3.67E-46 | **2.68E-43** |
| csnk2a1 | 0.00399 | 0.00049 | 8.18882 | 2.74E-16 | **1.60E-13** |
| fgfbp1 | 0.00258 | 0.00045 | 5.71435 | 1.11E-08 | **5.39E-06** |
| bpifb2 | -0.00266 | 0.00047 | -5.64173 | 1.70E-08 | **6.38E-06** |
| nectin2 | -0.00248 | 0.00044 | -5.63635 | 1.75E-08 | **6.38E-06** |
| brk1 | 0.00253 | 0.00046 | 5.54728 | 2.92E-08 | **9.46E-06** |
| man2b2 | -0.00247 | 0.00047 | -5.21673 | 1.83E-07 | **5.34E-05** |
| palm | 0.00241 | 0.00047 | 5.17067 | 2.35E-07 | **6.22E-05** |
| ern1 | -0.00247 | 0.00048 | -5.14472 | 2.70E-07 | **6.55E-05** |
| pdgfc | -0.00229 | 0.00046 | -4.98137 | 6.34E-07 | **1.42E-04** |
| apof | 0.00202 | 0.00044 | 4.57535 | 4.77E-06 | **9.93E-04** |
| pla2g10 | -0.00197 | 0.00044 | -4.47116 | 7.80E-06 | **1.52E-03** |
| hmox1 | -0.00185 | 0.00044 | -4.16255 | 3.15E-05 | **5.75E-03** |
| cd99l2 | -0.00179 | 0.00044 | -4.03319 | 5.51E-05 | **9.45E-03** |
| gm2a | -0.00174 | 0.00045 | -3.82378 | 1.32E-04 | **2.08E-02** |
| tfpi | 0.00168 | 0.00044 | 3.81653 | 1.36E-04 | **2.08E-02** |
| ctsz | -0.00165 | 0.00044 | -3.78185 | 1.56E-04 | **2.27E-02** |
| lrrc37a2 | -0.00177 | 0.00048 | -3.67465 | 2.39E-04 | **3.26E-02** |
| spon2 | -0.00161 | 0.00044 | -3.66112 | 2.51E-04 | **3.26E-02** |
| creg1 | -0.00165 | 0.00045 | -3.64668 | 2.66E-04 | **3.26E-02** |
| agr2 | -0.00166 | 0.00046 | -3.64405 | 2.69E-04 | **3.26E-02** |
| angptl3 | -0.00145 | 0.00041 | -3.58834 | 3.33E-04 | **3.64E-02** |
| psap | -0.00167 | 0.00046 | -3.58688 | 3.35E-04 | **3.64E-02** |
| glb1 | -0.00156 | 0.00044 | -3.58507 | 3.37E-04 | **3.64E-02** |
| rp2 | 0.00163 | 0.00046 | 3.55402 | 3.80E-04 | **3.95E-02** |
| **Alternative haplotype** | | | | | |
| **Protein** | **Beta** | **SE** | **t_value** | **p_value** | **FDR** |
| apoe | -0.00419 | 0.00036 | -11.50781 | 1.39E-30 | **4.06E-27** |
| pla2g7 | 0.00170 | 0.00033 | 5.07173 | 3.96E-07 | **5.77E-04** |
| crtam | 0.00169 | 0.00035 | 4.78480 | 1.72E-06 | **1.67E-03** |
| ment | 0.00171 | 0.00036 | 4.70799 | 2.51E-06 | **1.83E-03** |
| serpind1 | -0.00159 | 0.00038 | -4.20795 | 2.58E-05 | **1.32E-02** |
| cxcl16 | -0.00144 | 0.00035 | -4.17433 | 3.00E-05 | **1.32E-02** |
| snap25 | 0.00157 | 0.00038 | 4.16196 | 3.16E-05 | **1.32E-02** |
| brk1 | 0.00146 | 0.00036 | 4.08330 | 4.45E-05 | **1.62E-02** |
| ceacam16 | 0.00150 | 0.00038 | 3.97923 | 6.93E-05 | **2.24E-02** |
| ldlr | -0.00134 | 0.00035 | -3.80486 | 1.42E-04 | **4.14E-02** |

Beta, effect size; FDR, false discovery rate; SE, standard error.

### *Table S14. Phenome-wide association study results for the Evo2 haplotype score in the UK Biobank data (FDR < 0.05).*

| **Leading haplotype** | | | | | | |
| --- | --- | --- | --- | --- | --- | --- |
| **Phecode** | **Disease** | **Beta** | **SE** | **z_value** | **p_value** | **FDR** |
| **290.11** | Alzheimer's disease | 0.0283 | 0.0018 | 15.4080 | 1.45E-53 | 2.24E-50 |
| **290.13** | Senile dementia | 0.0164 | 0.0017 | 9.7596 | 1.68E-22 | 1.30E-19 |
| **272.11** | Hypercholesterolemia | 0.0038 | 0.0004 | 9.1437 | 6.03E-20 | 3.11E-17 |
| **292.4** | Altered mental status | 0.0061 | 0.0011 | 5.3761 | 7.61E-08 | 2.94E-05 |
| **411.4** | Coronary atherosclerosis | 0.0026 | 0.0005 | 4.6589 | 3.18E-06 | 9.84E-04 |
| **290.1** | Dementias | 0.0211 | 0.0049 | 4.3366 | 1.45E-05 | 3.73E-03 |
| **272.1** | Hyperlipidemia | 0.0036 | 0.0009 | 4.1053 | 4.04E-05 | 8.93E-03 |
| **411.3** | Angina pectoris | 0.0025 | 0.0006 | 4.0448 | 5.24E-05 | 1.01E-02 |
| **694.2** | Other dyschromia | 0.0091 | 0.0025 | 3.6919 | 2.23E-04 | 3.83E-02 |
|  |  |  |  |  |  |  |
| **Alternative haplotype** | | | | | | |
| **Phecode** |  | **Beta** | **SE** | **z_value** | **p_value** | **FDR** |
| **290.13** | Senile dementia | 0.0079 | 0.0012 | 6.5332 | 6.44E-11 | 9.96E-08 |
| **290.11** | Alzheimer's disease | 0.0078 | 0.0013 | 6.1179 | 9.48E-10 | 7.33E-07 |

Beta, effect size; FDR, false discovery rate; SE, standard error. ICD‑10 codes were mapped to Phecodes using Phecode Map 1.2 from the PheWAS Resources repository (<https://phewascatalog.org/>).

References

1. Jansen, I. E. *et al.* Genome-wide meta-analysis identifies new loci and functional pathways influencing Alzheimer’s disease risk. *Nature Genetics* **51**, 404–413 (2019).

2. Liao, W.-W. *et al.* A draft human pangenome reference. *Nature* **617**, 312–324 (2023).

3. Montgomery, S. B. *et al.* Transcriptome genetics using second generation sequencing in a Caucasian population. *Nature* **464**, 773–777 (2010).

4. Nica, A. C. *et al.* Candidate Causal Regulatory Effects by Integration of Expression QTLs with Complex Trait Genetic Associations. *PLOS Genetics* **6**, e1000895 (2010).

5. Saykin, A. J. *et al.* Alzheimer’s Disease Neuroimaging Initiative biomarkers as quantitative phenotypes: Genetics core aims, progress, and plans. *Alzheimer’s & Dementia* **6**, 265–273 (2010).

6. Landau, S. M., Horng, A., Jagust, W. J., & For the Alzheimer’s Disease Neuroimaging Initiative. Memory decline accompanies subthreshold amyloid accumulation. *Neurology* **90**, e1452–e1460 (2018).

7. Belloy, M. E. *et al.* APOE Genotype and Alzheimer Disease Risk Across Age, Sex, and Population Ancestry. *JAMA Neurology* **80**, 1284–1294 (2023).
